# Supplementary material
Source: Springer Nature journal article supplement (https://www.springermedizin.de/resource/supplementary/12888_2011_879_MOESM1_ESM.pdf/9478412)

Month

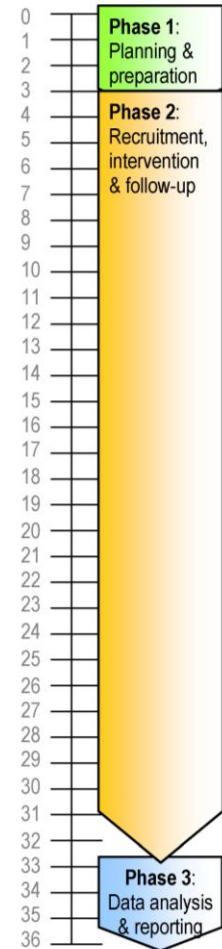

Study protocol, submission to authorities, trial registration  
initiation of centres, training therapists & raters

**Screening for eligibility (n=450)**  
Diagnosis of chronic depression:  
-Information on study  
-Screening in- & exclusion criteria  
-Informed consent

Baseline interview  
(T=0)

**Randomization (n=268)**  
Stratification: centre

**SP**  
(n=134)

**CBASP**  
(n=134)

**Acute treatment**  
week 1...4 two weekly sessions  
week 5..20 weekly sessions

T=1, week 12  
T=2, week 20

**Continuation treatment**  
wk 21...25 two monthly sessions  
wk 26..48 monthly sessions

End-Interview (T=3,  
week 48)

ITT-analysis (n=268)

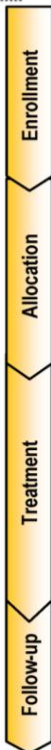

Supplement: MOESM1 [file 9478412]
